# Supplementary material for: An overview of traditional smoking cessation interventions and E-cigarettes
Source: Frontiers journal article supplement (doi:10.3389/fphar.2024.1293062), 2024-07-22
Supplement: Table_1.pdf [file Table_1.pdf]

| #  | Study Title                                                                                                                                                                                             | Study Status | Conditions                             | Interventions                                                                     | Sponsor                           | Collaborators                                                                                | Study Type     |
|----|---------------------------------------------------------------------------------------------------------------------------------------------------------------------------------------------------------|--------------|----------------------------------------|-----------------------------------------------------------------------------------|-----------------------------------|----------------------------------------------------------------------------------------------|----------------|
| 1. | Efficacy and Safety of E-cigarettes for Smoking Cessation in Middle-aged Heavy Smokers                                                                                                                  | Completed    | Smoking Cessation Electronic Cigarette | DRUG: Nicotine DRUG: Varenicline Tartrate BEHAVIORAL: Motivational Interview      | University of Oulu                | Lapland Central Hospital Rovaniemi Finland                                                   | Interventional |
| 2. | Enhanced E-cigarette Coaching Intervention for Dual Users of Cigarettes and E-cigarettes                                                                                                                | Completed    | Smoking Cessation                      | BEHAVIORAL: Enhanced E-cigarette Coaching BEHAVIORAL: Quitline treatment as usual | Consumer Wellness Solutions       | University of Oklahoma SRI International H. Lee Moffitt Cancer Center and Research Institute | Interventional |
| 3. | A Structured Protocol to Evaluate Efficacy and Safety of a Popular Electronic Nicotine Delivery Device (E-Cigarette) Efficacy and Safety of a Popular Electronic Nicotine Delivery Device (E-Cigarette) | Completed    | Healthy Smokers Smoking Cessation      |                                                                                   | Universita degli Studi di Catania | Lega Italiana Anti Fumo Arbi Group Srl                                                       | Observational  |
| 4. | Implementation and Dissemination of an Evidence-Based Tobacco Product Use Prevention Videogame                                                                                                          | Completed    | Smoking Cessation Smoking              | DEVICE: smokeSCREEN web-based game                                                | Yale University                   |                                                                                              | Interventional |

|    | Intervention With Adolescents                                                                                                                 |           |                              |                                                                                                                   |                                |                                                                                                                                                                                                                                                                        |                |
|----|-----------------------------------------------------------------------------------------------------------------------------------------------|-----------|------------------------------|-------------------------------------------------------------------------------------------------------------------|--------------------------------|------------------------------------------------------------------------------------------------------------------------------------------------------------------------------------------------------------------------------------------------------------------------|----------------|
| 5. | The ESTxENDS Trial-<br>Electronic Nicotine<br>Delivery Systems as<br>an Aid for Smoking<br>Cessation-<br>extension of<br>Follow-up            | Completed | Smoking Cessation            | OTHER: ENDS<br>(vaporizer/e-cig) and<br>smoking cessation<br>counseling OTHER:<br>Smoking cessation<br>counseling | University of Bern             | University of<br>Lausanne University<br>of Geneva,<br>Switzerland University<br>of Zurich State<br>Hospital, St.<br>Gallen Swiss National<br>Science<br>Foundation Krebsforsch<br>ung Schweiz, Bern,<br>Switzerland Federal<br>Office of Public Health,<br>Switzerland | Interventional |
| 6. | Nicotine<br>Pharmacokinetics<br>From Research<br>Electronic Nicotine<br>Delivery System S-<br>TA-U001 in<br>Smokers and E-<br>Cigarette Users | Completed | Cigarette Smoking            | DRUG: Research ENDS<br>S-TA-U001 DRUG:<br>Nicorette Inhalator                                                     | NJOY, Inc.                     | LA Clinical<br>Trials National<br>Institute on Drug<br>Abuse (NIDA)                                                                                                                                                                                                    | Interventional |
| 7. | Early Smoking<br>Reduction or<br>Cessation by<br>Means of no<br>Nicotine Electronic<br>Cigarette Added to<br>Standard<br>Counselling.         | Completed | Cancer Myocardial Infarction | DEVICE: No nicotine<br>electronic<br>cigarette OTHER:<br>Standard counseling                                      | European Institute of Oncology |                                                                                                                                                                                                                                                                        | Interventional |

|     |                                                                                                                                                                    |           |                                    |                                                                                                    |                                        |                                                                                                                                                                                              |                |
|-----|--------------------------------------------------------------------------------------------------------------------------------------------------------------------|-----------|------------------------------------|----------------------------------------------------------------------------------------------------|----------------------------------------|----------------------------------------------------------------------------------------------------------------------------------------------------------------------------------------------|----------------|
| 8.  | Does Abstinence From E-cigarettes Produce Withdrawal Symptoms?                                                                                                     | Completed | Substance Withdrawal Syndrome      | BEHAVIORAL: Abstinence from e-cigarettes                                                           | University of Vermont                  | National Cancer Institute (NCI)                                                                                                                                                              | Interventional |
| 9.  | Evaluating the Efficacy of E-Cigarette Use for Smoking Cessation (E3) Trial                                                                                        | Completed | Smoking Cessation                  | OTHER: Nicotine E-Cigarette OTHER: Non-Nicotine E-Cigarette BEHAVIORAL: Counseling                 | McGill University                      | Sir Mortimer B. Davis - Jewish General Hospital                                                                                                                                              | Interventional |
| 10. | Quit IT: Preliminary Testing of a Web-based, 3D Coping Skills Game to Increase Quitting Self-Efficacy for Maintaining Smoking Abstinence Following Hospitalization | Completed | Tobacco Use Cessation              | OTHER: web-based video game (Quit IT) BEHAVIORAL: Questionnaires OTHER: Salvia sample              | Memorial Sloan Kettering Cancer Center | New York University Muzzy Lane Software                                                                                                                                                      | Interventional |
| 11. | ESTxENDS Trial-Substudy on Oxidative Stress Induced by Electronic Nicotine Delivery Systems (ENDS) Measured in Urine                                               | Completed | Smoking Cessation Oxidative Stress | OTHER: ENDS (vaporizer/e-cig) and smoking cessation counseling OTHER: smoking cessation counseling | University of Bern                     | University of Lausanne University of Geneva, Switzerland University of Zurich State Hospital, St. Gallen Swiss National Science Foundation Krebsforschung Schweiz, Bern, Switzerland Federal | Interventional |

|     |                                                                                                         |           |                                                                                                      |                                                                                                                                |                                         |                                         |                |
|-----|---------------------------------------------------------------------------------------------------------|-----------|------------------------------------------------------------------------------------------------------|--------------------------------------------------------------------------------------------------------------------------------|-----------------------------------------|-----------------------------------------|----------------|
|     |                                                                                                         |           |                                                                                                      |                                                                                                                                |                                         | Office of Public Health,<br>Switzerland |                |
| 12. | Clinical Learning Study for a Mobile Smoking Cessation Program                                          | Completed | Smoking Cessation Smoking Behaviors Smoking Reduction Smoking, Cigarette Smoking Nicotine Dependence | DEVICE: Clickotine <sup>™</sup>                                                                                                | Click Therapeutics, Inc.                |                                         | Observational  |
| 13. | Promoting Smoking Cessation in the Community Via QTW 2014                                               | Completed | Smoking Cessation Intervention                                                                       | BEHAVIORAL: Quit immediately (QI) / cut down to quit (CDTQ)                                                                    | The University of Hong Kong             | Hong Kong Council on Smoking and Health | Interventional |
| 14. | Efficacy and Safety of an Electronic Nicotine Delivery Device (E-Cigarette) Without Nicotine Cartridges | Completed | Healthy Smokers Smoking Cessation                                                                    |                                                                                                                                | Universita degli Studi di Catania       | Lega Italiana Anti Fumo Arbi Group Srl  | Observational  |
| 15. | The END Perioperative Smoking Pilot Study                                                               | Completed | Smoking Nicotine Addiction Surgery                                                                   | BEHAVIORAL: ENDD (NJOY) DRUG: NRT (NicoDerm CQ) BEHAVIORAL: telephone counseling BEHAVIORAL: brief advice BEHAVIORAL: brochure | University of California, San Francisco |                                         | Interventional |
| 16. | Smoking Cessation and Reduction With an Electronic Nicotine Delivery Device (ENDD)                      | Completed | Nicotine Dependence Smoking Cessation                                                                | DEVICE: E-Cigarette 7.2 mg nicotine                                                                                            | Universita degli Studi di Catania       | Lega Italiana Anti Fumo Arbi Group Srl  | Interventional |
| 17. | A Comparison of the Effectiveness of                                                                    | Completed | Smoking                                                                                              | BEHAVIORAL: quit immediately                                                                                                   | The University of Hong Kong             |                                         | Interventional |

|     |                                                                                                                                         |           |                                         |                                                                                                      |                                     |                                                                                                                                                                                                                                               |                |
|-----|-----------------------------------------------------------------------------------------------------------------------------------------|-----------|-----------------------------------------|------------------------------------------------------------------------------------------------------|-------------------------------------|-----------------------------------------------------------------------------------------------------------------------------------------------------------------------------------------------------------------------------------------------|----------------|
|     | Two Approaches in Achieving Smoking Abstinence                                                                                          |           |                                         | (QI)   BEHAVIORAL: cut down to quit (CDTQ)                                                           |                                     |                                                                                                                                                                                                                                               |                |
| 18. | Zonisamide/Bupropion Effects on Switching to Electronic Cigarettes                                                                      | Completed | Smoking Cessation                       | DRUG: Zonisamide   DRUG: Bupropion   OTHER: Halo G6 e-cigarette                                      | Rose Research Center, LLC           | Foundation for a Smoke Free World INC                                                                                                                                                                                                         | Interventional |
| 19. | The ESTxENDS Trial-Substudy on the Effects of Using Electronic Nicotine Delivery Systems (ENDS/Vaporizer/E-cig) on Respiratory Symptoms | Completed | Smoking Cessation   Respiratory Disease | OTHER: ENDS (vaporizer/e-cig) and smoking cessation counseling   OTHER: Smoking cessation counseling | University of Bern                  | University of Lausanne   University of Geneva, Switzerland   University of Zurich   State Hospital, St. Gallen   Swiss National Science Foundation   Krebsforschung Schweiz, Bern, Switzerland   Federal Office of Public Health, Switzerland | Interventional |
| 20. | Efficacy and Safety of an Electronic Nicotine Delivery Device (E-Cigarette)                                                             | Completed | Healthy Smokers   Smoking Cessation     |                                                                                                      | Universita degli Studi di Catania   | Lega Italiana Anti Fumo   Arbi Group Srl                                                                                                                                                                                                      | Observational  |
| 21. | The Use of Nicotine Patches Together With E-cigarettes (With and Without Nicotine) for Smoking Cessation                                | Completed | Smoking Cessation                       | DRUG: Nicotine patch   DEVICE: e-cigarette   DRUG: Nicotine   BEHAVIORAL: Behavioural support        | University of Auckland, New Zealand | Health New Zealand Ltd, Christchurch, New Zealand   Auckland District Health Board                                                                                                                                                            | Interventional |
| 22. | The ESTxENDS Trial-Electronic Nicotine                                                                                                  | Completed | Smoking Cessation                       | OTHER: ENDS (vaporizer/e-cig) and                                                                    | University of Bern                  | University of Lausanne   University                                                                                                                                                                                                           | Interventional |

|     |                                                                                                                    |           |                                                                         |                                                                                                                                                              |                                      |                                                                                                             |                |
|-----|--------------------------------------------------------------------------------------------------------------------|-----------|-------------------------------------------------------------------------|--------------------------------------------------------------------------------------------------------------------------------------------------------------|--------------------------------------|-------------------------------------------------------------------------------------------------------------|----------------|
|     | Delivery Systems (ENDS/Vaporizer/E-cigarette) as an Aid for Smoking Cessation.                                     |           |                                                                         | smoking cessation counseling  OTHER: Smoking cessation counseling                                                                                            |                                      | of Geneva, Switzerland  University of Zurich  State Hospital, St. Gallen  Swiss National Science Foundation |                |
| 23. | Feasibility of a Decision Aid for E-Cigarettes in Primary Care                                                     | Completed | Smoking, Cigarette  Smoking Cessation                                   | BEHAVIORAL: Smoking Cessation iPad Decision Aid Tool                                                                                                         | University of Florida                |                                                                                                             | Interventional |
| 24. | E-Visit for COPD and Smoking Cessation                                                                             | Completed | Pulmonary Disease, Chronic Obstructive  Cigarette Smoking  Telemedicine | BEHAVIORAL: smoking cessation, early COPD detection, electronic visit  OTHER: Treatment As Usual                                                             | Medical University of South Carolina |                                                                                                             | Interventional |
| 25. | ESTxENDS Trial-Substudy on Oxidative Stress Induced by Electronic Nicotine Delivery Systems (ENDS) Measured in EBC | Completed | Smoking Cessation  Oxidative Stress                                     | OTHER: ENDS (vaporizer/e-cig) and smoking cessation counseling  OTHER: Smoking cessation counseling                                                          | University of Bern                   | University of Lausanne  University of Geneva, Switzerland  Swiss National Science Foundation                | Interventional |
| 26. | Randomized Clinical Trial to Reduce Harm From Tobacco                                                              | Completed | Smoking Cessation                                                       | BEHAVIORAL: E-cigarette free access  BEHAVIORAL: E-cigarette/NRT/Zyban/Chantix Choice  BEHAVIORAL: Outcome Incentive arm  BEHAVIORAL: Loss framing incentive | University of Pennsylvania           | Vitality Institute                                                                                          | Interventional |

|     |                                                                                                                                                              |           |                                                                                 |                                                                                                      |                               |                                                                                                                                                                                                          |                |
|-----|--------------------------------------------------------------------------------------------------------------------------------------------------------------|-----------|---------------------------------------------------------------------------------|------------------------------------------------------------------------------------------------------|-------------------------------|----------------------------------------------------------------------------------------------------------------------------------------------------------------------------------------------------------|----------------|
|     |                                                                                                                                                              |           |                                                                                 | arm   BEHAVIORAL:<br>Control                                                                         |                               |                                                                                                                                                                                                          |                |
| 27. | Comparing Nicotine Delivery, Subjective Effects, and Sensory Experiences of Tobacco Users Using Oral Nicotine Products and Electronic Cigarettes [ZYN Study] | Completed | Tobacco Use   Tobacco Smoking   Cigarette Smoking   Smokeless Tobacco Cessation | OTHER: Electronic Cigarette   OTHER: Oral Nicotine Pouch                                             | Roswell Park Cancer Institute |                                                                                                                                                                                                          | Interventional |
| 28. | Preliminary Evaluation of Alternative Approaches to Combustible Cigarette Cessation (Exchange Project Sub-Study)                                             | Completed | Smoking Cessation                                                               | BEHAVIORAL: E-cigarette   BEHAVIORAL: Financial incentives + E-cigarette                             | University of Oklahoma        |                                                                                                                                                                                                          | Interventional |
| 29. | The ESTxENDS Trial-Substudy on the Effects of Using Electronic Nicotine Delivery Systems (ENDS) on Sleep Quality.                                            | Completed | Smoking Cessation   Sleep                                                       | OTHER: ENDS (vaporizer/e-cig) and smoking cessation counseling   OTHER: Smoking cessation counseling | University of Bern            | University of Lausanne   University of Geneva, Switzerland   University of Zurich   State Hospital, St. Gallen   Swiss National Science Foundation   Krebsforschung Schweiz, Bern, Switzerland   Federal | Interventional |

|     |                                                                                                                                                  |           |                                                                                             |                                                                                                                                                                                                                                                |                                      |                                                                                                                                                              |                |
|-----|--------------------------------------------------------------------------------------------------------------------------------------------------|-----------|---------------------------------------------------------------------------------------------|------------------------------------------------------------------------------------------------------------------------------------------------------------------------------------------------------------------------------------------------|--------------------------------------|--------------------------------------------------------------------------------------------------------------------------------------------------------------|----------------|
|     |                                                                                                                                                  |           |                                                                                             |                                                                                                                                                                                                                                                |                                      | Office of Public Health,<br>Switzerland                                                                                                                      |                |
| 30. | Smoking Cessation<br>E-Visit                                                                                                                     | Completed | Smoking                                                                                     | BEHAVIORAL: Smoking<br>cessation e-<br>visit   BEHAVIORAL:<br>Treatment As Usual                                                                                                                                                               | Medical University of South Carolina |                                                                                                                                                              | Interventional |
| 31. | E-cigarettes and<br>Cardiovascular<br>Function                                                                                                   | Completed | Smoking<br>Cessation   Cardiovascular<br>Diseases   Microcirculation   Ma<br>crocirculation | OTHER: Electronic<br>Cigarette and<br>behavioural change<br>support.   OTHER:<br>Nicotine-Free Electronic<br>Cigarette and<br>behavioural change<br>support.   OTHER:<br>Nicotine Replacement<br>Therapy and<br>behavioural change<br>support. | Sheffield Hallam<br>University       | King's College<br>London   Heart<br>Research<br>U.K.   Help2Change                                                                                           | Interventional |
| 32. | Deliver an<br>Evidence-based<br>Smoking Cessation<br>Intervention for<br>Smokers Attending<br>A&E Departments<br>in Hong Kong                    | Completed | Smoking   Smoking<br>Cessation   Evidence-Based<br>Nursing   Emergency Service,<br>Hospital | BEHAVIORAL: an<br>evidence-based<br>smoking cessation<br>intervention comprising<br>brief advice plus active<br>referrals                                                                                                                      | The University of<br>Hong Kong       | Chinese University of<br>Hong Kong                                                                                                                           | Interventional |
| 33. | The ESTxENDS Trial-<br>Substudy on the<br>Metabolic Effects of<br>Using Electronic<br>Nicotine Delivery<br>Systems<br>(ENDS/Vaporizer/E-<br>cig) | Completed | Smoking<br>Cessation   Cardiovascular<br>Diseases                                           | OTHER: ENDS<br>(vaporizer/e-cig) and<br>smoking cessation<br>counseling   OTHER:<br>Smoking cessation<br>counseling                                                                                                                            | University of Bern                   | University of<br>Lausanne   University<br>of Geneva,<br>Switzerland   University<br>of Zurich   State<br>Hospital, St.<br>Gallen   Swiss National<br>Science | Interventional |



|     |                                                                                                                                                                                                                     |           |                                    |                                                                                                                     |                                                           |                                                                                                                                                                                                                                                                                    |                |
|-----|---------------------------------------------------------------------------------------------------------------------------------------------------------------------------------------------------------------------|-----------|------------------------------------|---------------------------------------------------------------------------------------------------------------------|-----------------------------------------------------------|------------------------------------------------------------------------------------------------------------------------------------------------------------------------------------------------------------------------------------------------------------------------------------|----------------|
|     |                                                                                                                                                                                                                     |           |                                    |                                                                                                                     |                                                           | Foundation   Krebsforsch<br>ung Schweiz, Bern,<br>Switzerland   Federal<br>Office of Public Health,<br>Switzerland                                                                                                                                                                 |                |
| 34. | UK-Czech E-<br>cigarette Study                                                                                                                                                                                      | Completed | Smoking Cessation                  | OTHER: Standard care<br>plus electronic<br>cigarettes   BEHAVIORAL<br>: Standard care                               | Queen Mary University of London                           |                                                                                                                                                                                                                                                                                    | Interventional |
| 35. | Smoking Cessation<br>in Women With<br>Gynecological<br>Conditions                                                                                                                                                   | Completed | Cervical Dysplasia                 | OTHER: Nicotine<br>Replacement<br>Therapy   DEVICE:<br>Electronic Cigarettes                                        | University of Oklahoma                                    |                                                                                                                                                                                                                                                                                    | Interventional |
| 36. | Toxins and Delivery<br>in e-Cigarette Users                                                                                                                                                                         | Completed | Smoking Cessation                  | OTHER: e-Cigarette                                                                                                  | Queen Mary University of London                           |                                                                                                                                                                                                                                                                                    | Observational  |
| 37. | ESTxENDS Trial: MN<br>Substudy -<br>Micronuclei in<br>Buccal Epithelium,<br>a Surrogate<br>Measure of Future<br>Cancer Risk,<br>Induced by<br>Electronic Nicotine<br>Delivery Systems<br>(ENDS/Vaporizer/E-<br>cig) | Completed | Smoking<br>Cessation   Micronuclei | OTHER: ENDS<br>(vaporizer/e-cig) and<br>smoking cessation<br>counseling   OTHER:<br>Smoking cessation<br>counseling | University of Bern                                        | University of<br>Lausanne   University<br>of Geneva,<br>Switzerland   University<br>of Zurich   State<br>Hospital, St.<br>Gallen   Swiss National<br>Science<br>Foundation   Krebsforsch<br>ung Schweiz, Bern,<br>Switzerland   Federal<br>Office of Public Health,<br>Switzerland | Interventional |
| 38. | Smoking Cessation<br>Self-Help for Dual<br>Users of Tobacco<br>Cigarettes and E-<br>Cigarettes                                                                                                                      | Completed | Smoking Cessation                  | BEHAVIORAL:<br>GENERIC   BEHAVIORAL:<br>eTARGET                                                                     | H. Lee Moffitt<br>Cancer Center and<br>Research Institute | National Institute on<br>Drug Abuse<br>(NIDA)   National<br>Institutes of Health<br>(NIH)                                                                                                                                                                                          | Interventional |

|     |                                                                                                                            |           |                                            |                                                                                                      |                                        |                                                                                                                                                                                                                                               |                |
|-----|----------------------------------------------------------------------------------------------------------------------------|-----------|--------------------------------------------|------------------------------------------------------------------------------------------------------|----------------------------------------|-----------------------------------------------------------------------------------------------------------------------------------------------------------------------------------------------------------------------------------------------|----------------|
| 39. | The MATCH (Medication Aids for Tobacco Cessation and Health) Study                                                         | Completed | Tobacco Use Disorder   Nicotine Dependence | DRUG: Bupropion   DRUG: Varenicline   BEHAVIORAL: Weekly Motivational Emails                         | Centre for Addiction and Mental Health | Global Research Awards for Nicotine Dependence (GRAND)                                                                                                                                                                                        | Interventional |
| 40. | Combination of E-cigarettes and Varenicline for Tobacco Harm Reduction                                                     | Completed | Smoking Cessation   Harm Reduction         | DRUG: Varenicline   OTHER: e-cigarette                                                               | Rose Research Center, LLC              | Foundation for a Smoke Free World INC                                                                                                                                                                                                         | Interventional |
| 41. | The ESTxENDS Trial-Substudy on Effects of Using Electronic Nicotine Delivery Systems (ENDS) on Olfactory Function          | Completed | Smoking Cessation   Olfactory Disorder     | OTHER: ENDS (vaporizer/e-cig) and smoking cessation counseling   OTHER: Smoking cessation counseling | University of Bern                     | University of Lausanne   University of Geneva, Switzerland   University of Zurich   State Hospital, St. Gallen   Swiss National Science Foundation   Krebsforschung Schweiz, Bern, Switzerland   Federal Office of Public Health, Switzerland | Interventional |
| 42. | The ESTxENDS Trial-Substudy on the Effect on Toxins From Using Electronic Nicotine Delivery Systems (ENDS/Vaporizer/E-cig) | Completed | Smoking Cessation   Toxicity               | OTHER: ENDS (Vaporizer/e-cig) and smoking cessation counseling   OTHER: Smoking cessation counseling | University of Bern                     | University of Lausanne   University of Geneva, Switzerland   University of Zurich   State Hospital, St. Gallen   Swiss National Science Foundation   Krebsforschung Schweiz, Bern,                                                            | Interventional |

|     |                                                                                                               |           |                                       |                                                                                                      |                    |                                                                                                                                                                                                                                               |                |
|-----|---------------------------------------------------------------------------------------------------------------|-----------|---------------------------------------|------------------------------------------------------------------------------------------------------|--------------------|-----------------------------------------------------------------------------------------------------------------------------------------------------------------------------------------------------------------------------------------------|----------------|
|     |                                                                                                               |           |                                       |                                                                                                      |                    | Switzerland   Federal Office of Public Health, Switzerland                                                                                                                                                                                    |                |
| 43. | The ESTxENDS Trial: Pulmonary Function Substudy                                                               | Completed | Smoking Cessation   Pulmonary Disease | OTHER: ENDS (vaporizer/e-cig) and smoking cessation counseling   OTHER: Smoking cessation counseling | University of Bern | Swiss National Science Foundation   Bernese Lung League   Clinical Trial Unit Grant of the Inselspital Bern                                                                                                                                   | Interventional |
| 44. | The ESTxENDS Trial-Substudy on the Effects of Using Electronic Nicotine Delivery Systems (ENDS) on Depression | Completed | Smoking Cessation   Depression        | OTHER: ENDS (vaporizer/e-cig) and smoking cessation counseling   OTHER: Smoking cessation counseling | University of Bern | University of Lausanne   University of Geneva, Switzerland   University of Zurich   State Hospital, St. Gallen   Swiss National Science Foundation   Krebsforschung Schweiz, Bern, Switzerland   Federal Office of Public Health, Switzerland | Interventional |
